# Supplementary material
Source: MDPI journal article supplement (https://www.mdpi.com/2071-1050/16/9/3589)
Supplement: s1 [file s1]

**Supplementary File S1: List of Interviewees.**

| <b>Interview</b> | <b>Position</b> | <b>Location</b> | <b>Date of Interview</b> |
|------------------|-----------------|-----------------|--------------------------|
| 1                | Retailer        | Brooklyn        | June 10, 2021            |
| 2                | Retailer        | Brooklyn        | June 10, 2021            |
| 3                | Retailer        | Brooklyn        | June 10, 2021            |
| 4                | Retailer        | Brooklyn        | June 10, 2021            |
| 5                | Retailer        | Brooklyn        | June 10, 2021            |
| 6                | Retailer        | Brooklyn        | June 10, 2021            |
| 7                | Retailer        | Brooklyn        | June 10, 2021            |
| 8                | Retailer        | Brooklyn        | June 10, 2021            |
| 9                | Retailer        | Brooklyn        | June 10, 2021            |
| 10               | Retailer        | Brooklyn        | June 10, 2021            |
| 11               | Retailer        | Brooklyn        | June 10, 2021            |
| 12               | Retailer        | Brooklyn        | June 10, 2021            |
| 13               | Retailer        | Brooklyn        | June 10, 2021            |
| 14               | Retailer        | Brooklyn        | June 10, 2021            |
| 15               | Retailer        | Brooklyn        | June 10, 2021            |
| 16               | Retailer        | Brooklyn        | June 10, 2021            |
| 17               | Retailer        | Flushing        | June 26, 2021            |
| 18               | Retailer        | Flushing        | June 26, 2021            |
| 19               | Retailer        | Flushing        | June 26, 2021            |
| 20               | Retailer        | Flushing        | June 26, 2021            |
| 21               | Retailer        | Flushing        | June 26, 2021            |
| 22               | Retailer        | Flushing        | June 26, 2021            |
| 23               | Retailer        | Flushing        | June 26, 2021            |

|    |          |           |                   |
|----|----------|-----------|-------------------|
| 24 | Retailer | Flushing  | June 26, 2021     |
| 25 | Retailer | Flushing  | June 26, 2021     |
| 26 | Retailer | Flushing  | June 26, 2021     |
| 27 | Retailer | Flushing  | June 26, 2021     |
| 28 | Retailer | Flushing  | June 26, 2021     |
| 29 | Retailer | Flushing  | June 26, 2021     |
| 30 | Retailer | Flushing  | June 26, 2021     |
| 31 | Retailer | Flushing  | June 26, 2021     |
| 32 | Consumer | Manhattan | July 16, 2021     |
| 33 | Consumer | Manhattan | July 12, 2021     |
| 34 | Consumer | Brooklyn  | July 12, 2021     |
| 35 | Consumer | Manhattan | November 28, 2021 |
| 36 | Consumer | Manhattan | November 28, 2021 |
| 37 | Retailer | Manhattan | November 28, 2021 |
| 38 | Retailer | Manhattan | November 28, 2021 |
| 39 | Retailer | Manhattan | November 28, 2021 |
| 40 | Retailer | Manhattan | November 28, 2021 |
| 41 | Retailer | Manhattan | November 28, 2021 |
| 42 | Retailer | Brooklyn  | November 29, 2021 |
| 43 | Consumer | Brooklyn  | November 29, 2021 |
| 44 | Consumer | Brooklyn  | November 29, 2021 |
| 45 | Retailer | Brooklyn  | November 29, 2021 |
| 47 | Retailer | Flushing  | November 30, 2021 |
| 48 | Retailer | Flushing  | November 30, 2021 |
| 49 | Retailer | Flushing  | November 30, 2021 |

|    |          |           |                   |
|----|----------|-----------|-------------------|
| 50 | Retailer | Flushing  | November 30, 2021 |
| 51 | Retailer | Flushing  | December 1, 20221 |
| 52 | Retailer | Flushing  | December 1, 2021  |
| 53 | Retailer | Brooklyn  | March 24, 2023    |
| 54 | Retailer | Brooklyn  | March 24, 2023    |
| 55 | Retailer | Brooklyn  | March 24, 2023    |
| 56 | Retailer | Brooklyn  | March 24, 2023    |
| 57 | Retailer | Flushing  | April 25, 2023    |
| 58 | Consumer | Flushing  | April 25, 2023    |
| 59 | Retailer | Flushing  | April 25, 2023    |
| 60 | Retailer | Flushing  | April 25, 2023    |
| 61 | Consumer | Manhattan | April 26, 2023    |
| 62 | Retailer | Manhattan | April 26, 2023    |
| 63 | Consumer | Manhattan | April 26, 2023    |
| 64 | Retailer | Manhattan | April 26, 2023    |
