# Supplementary material
Source: MDPI journal article supplement (https://www.mdpi.com/2071-1050/16/9/3589)
Supplement: s1 [file s1 › Supplementary Figure S1.pdf]

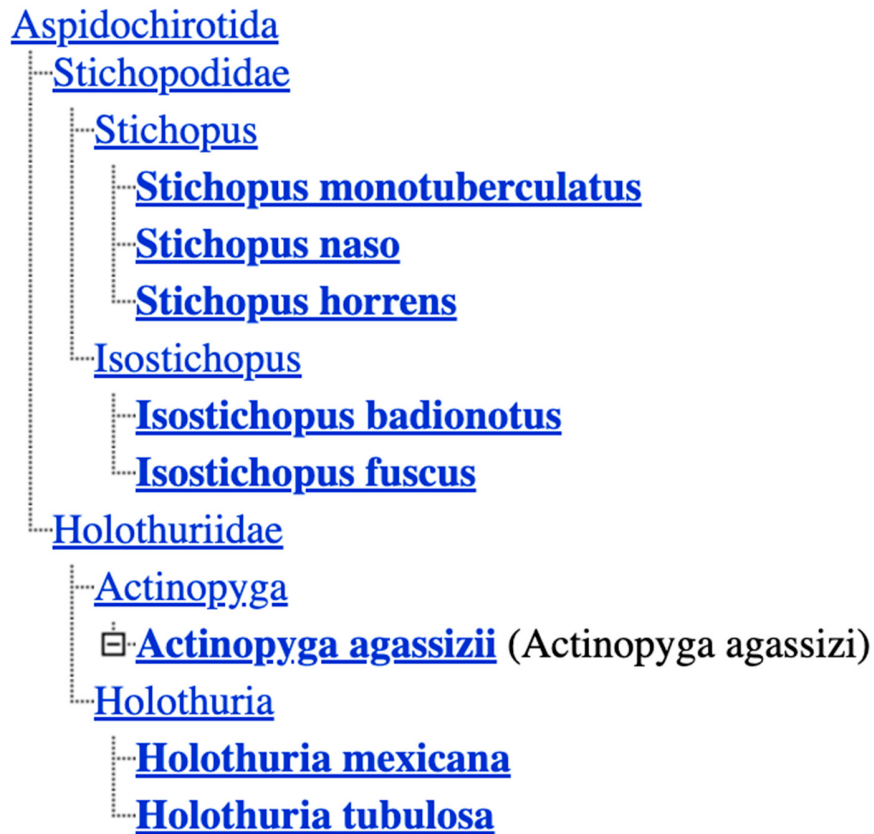

**Supplementary Figure S1.** Dendrogram showing the taxonomic relationships between the species and genera identified in our dried sea cucumber samples (see Supplementary File 2). The dendrogram is generated with the CommonTree tool in the NCBI taxonomy browser (<https://www.ncbi.nlm.nih.gov/Taxonomy/CommonTree/wwwcmt.cgi>, accessed 4/13-2024)
