# Supplementary material
Source: MDPI journal article supplement (https://www.mdpi.com/2071-1050/16/9/3589)
Supplement: s1 [file s1 › Supplementary File S3.xlsx]

## Sheet: Sheet1
Sample_ID	Sample_area	Sample_store	Claimed_region	Taxon_level	Genus	Taxon_assignment	Top_hit	Top_hit_Sim	Second_sp_hit	Second_hit_Sim
BK10_3	Brooklyn	Lang Feng Trading Inc 6328 8th Ave STE A 11220	South America	Genus	Holothuria	Holothuria sp.	Holothuria mexicana	0.9899	Holothuria floridana	0.9799
BK02_1	Brooklyn	Tian Xuan Trading Co. 6323 8th Avenue Suite A Brooklyn NY 11220	South America	Genus	Holothuria	Holothuria sp.	Holothuria mexicana	0.992	Holothuria floridana	0.9904
BK08_3	Brooklyn	Fortune Plus Trading Corp. 4510 8th Avenue Brooklyn, NY 1120	South America	Genus	Holothuria	Holothuria sp.	Holothuria mexicana	0.9899	Holothuria floridana	0.9799
BK01_1	Brooklyn	Wing Fat Company Inc. 5718 8th Ave. Brooklyn, NY 11220	South America	Genus	Stichopus	Stichopus sp.	Stichopus horrens	0.9718	Stichopus monotuberculatus	0.9671
BK01_2	Brooklyn	Wing Fat Company Inc. 5718 8th Ave. Brooklyn, NY 11220	South America	Genus	Stichopus	Stichopus sp.	Stichopus horrens	0.977	Stichopus monotuberculatus	0.9724
BK01_3	Brooklyn	Wing Fat Company Inc. 5718 8th Ave. Brooklyn, NY 11220	South America	Genus	Stichopus	Stichopus sp.	Stichopus horrens	0.972	Stichopus monotuberculatus	0.9673
BK02_3	Brooklyn	Tian Xuan Trading Co. 6323 8th Avenue Suite A Brooklyn NY 11220	South America	Genus	Holothuria	Holothuria sp.	Holothuria mexicana	0.9767	Synaptula reciprocans (note - all S.R. matches are from the same specimen - this is the "worm sea cucumber' - could this just be a coincidence?)	0.9806
BK05_3	Brooklyn	Kuan Sing Grocery Inc. 5606 8th Avenue Brooklyn, 11220	Mexico	Species	Isostichopus	Isostichopus fuscus	Isostichopus fuscus	0.9898	Isostichopus badionotus	0.9198
BK06_1	Brooklyn	Great Flavor Health Corp 5324 8th Avenue Brookyn, NY 11220	South America	Inconclusive	N/A	Stichopus or Isostichopus sp.	Stichopus horrens	0.9765	Isostichopus badionotus	0.9765
BK06_2	Brooklyn	"Great Flavor Health Corp 5324 8th Avenue Brookyn, NY 11220"	South America	Inconclusive	N/A	Stichopus or Isostichopus sp.	Stichopus horrens	0.9718	Isostichopus badionotus	0.9718
BK07_4	Brooklyn	Premium Ginseng Corp 5213 8th Avenue, Brooklyn NY 11220	Mexico	Species	Isostichopus	Isostichopus fuscus	Isostichopus fuscus	0.9858	Isostichopus badionotus	0.9336
BK08_2	Brooklyn	Fortune Plus Trading Corp. 4510 8th Avenue Brooklyn, NY 1120	South America	Genus	Holothuria	Holothuria sp.	Holothuria mexicana	0.9899	Holothuria floridana	0.9799
BK09_1	Brooklyn	Sunrise Herb Corp 6001 8th Avenue Brooklyn, NY 11220	Mexico	Species	Isostichopus	Isostichopus fuscus	Isostichopus fuscus	0.9899	Isostichopus badionotus	0.9242
BK09_2	Brooklyn	Sunrise Herb Corp 6001 8th Avenue Brooklyn, NY 11220	Mexico	Species	Isostichopus	Isostichopus fuscus	Isostichopus fuscus	0.981	Isostichopus badionotus	0.9289
BK09_3	Brooklyn	Sunrise Herb Corp 6001 8th Avenue Brooklyn, NY 11220	Mexico	Species	Isostichopus	Isostichopus fuscus	Isostichopus fuscus	0.9859	Isostichopus badionotus	0.9343
BK10_1	Brooklyn	Lang Feng Trading Inc 6328 8th Ave STE A 11220	South America	Genus	Holothuria	Holothuria sp.	Holothuria mexicana	0.9899	Holothuria floridana	0.9799
BK11_2	Brooklyn	Kuan Sing Food Market 5712 8th Avenue Brooklyn, NY 11220	Japan	Genus	Isostichopus	Isostichopus sp.	Isostichopus fuscus	0.9716	Isostichopus badionotus	0.9194
BK12_2	Brooklyn	Wing Fung 2019 5507 8th Avenue Brooklyn, NY 11220	South America	Genus	Stichopus	Stichopus sp.	Stichopus horrens	0.9725	Stichopus monotuberculatus	0.9679
BK12_3	Brooklyn	Wing Fung 2019 5507 8th Avenue Brooklyn, NY 11220	South America	Genus	Stichopus	Stichopus sp.	Stichopus horrens	0.9724	Stichopus monotuberculatus	0.9677
FL11_3	Flushing	Kar Wor Tong Inc. 135-50 Roosevelt Inc. Flushing, NY 11354	South America	Species	Isostichopus	Isostichopus fuscus	Isostichopus fuscus	0.99	Isostichopus badionotus	0.9252
FL05_1	Flushing	Ginseng Empire Inc. 42-11 Main Street Flushing, NY 11355	South America	Genus	Isostichopus	Isostichopus sp.	Isostichopus sp	0.9727	Isostichopus badionotus	0.9727
FL09_3	Flushing	New York Ginseng City 135-19 Roosevelt Avenue Flushing, NY 11354	Mexico	Species	Actinopyga	Actinopyga agassizi	Actinopyga agassizi	0.9951	Actinopyga miliaris	0.8454
FL01_2	Flushing	Jin Zheng Fa Inc 42-79 B and C Main St. Flushing, NY 11355	South America	Genus	Actinopyga	Actinopyga sp.	Actinopyga agassizi	0.9754	Actinopyga miliaris	0.8447
FL01_3	Flushing	Jin Zheng Fa Inc 42-79 B and C Main St. Flushing, NY 11355	South America	Species	Actinopyga	Actinopyga agassizi	Actinopyga agassizi	0.986	Actinopyga miliaris	0.8454
FL02_2	Flushing	K.Y.L. Natural Health 41-38 Main Street Flushing, NY11355	South America	Species	Actinopyga	Actinopyga agassizi	Actinopyga agassizi	0.986	Actinopyga miliaris	0.8454
FL02_3	Flushing	K.Y.L. Natural Health 41-38 Main Street Flushing, NY11355	South America	Species	Actinopyga	Actinopyga agassizi	Actinopyga agassizi	0.9817	Actinopyga miliaris	0.858
FL03_2	Flushing	Wing Fung 2019 Inc 41-60 Main Street, #102 Flushing, NY 1135	South America	Genus	Actinopyga	Actinopyga sp.	Actinopyga agassizi	0.9683	Actinopyga miliaris	0.8342
FL03_3	Flushing	Wing Fung 2019 Inc 41-60 Main Street, #102 Flushing, NY 1135	South America	Genus	Actinopyga	Actinopyga sp.	Actinopyga agassizi	0.96	Lytechinus euerces	0.7921
FL04_1	Flushing	Lele Highclass Health Products 4113 Kissena Blvd. Flushing, NY 1135	South America	Inconclusive	N/A	Stichopus or Isostichopus sp.	Stichopus horrens	0.9897	Isostichopus badionotus	0.9716
FL04_2	Flushing	Lele Highclass Health Products 4113 Kissena Blvd. Flushing, NY 1135	South America	Inconclusive	N/A	Stichopus or Isostichopus sp.	Stichopus horrens	0.9899	Isostichopus badionotus	0.9763
FL04_3	Flushing	Lele Highclass Health Products 4113 Kissena Blvd. Flushing, NY 1135	South America	Inconclusive	N/A	Stichopus or Isostichopus sp.	Stichopus horrens	0.9673	Isostichopus badionotus	0.9673
FL05_2	Flushing	Ginseng Empire Inc. 42-11 Main Street Flushing, NY 11355	South America	Genus	Isostichopus	Isostichopus sp.	Isostichopus sp	0.9854	Isostichopus badionotus	0.9854
FL05_4	Flushing	Ginseng Empire Inc. 42-11 Main Street Flushing, NY 11355	South America	Genus	Isostichopus	Isostichopus sp.	Isostichopus sp	0.9727	Isostichopus badionotus	0.9727
FL06_2	Flushing	Zen Ginseng 40-20 Main Street, Flushing, NY 11354	South America	Species	Holothuria	Holothuria tubulosa	Holothuria tubulosa	0.9811	Holothuria lentiginosa	0.9151
FL06_3	Flushing	Zen Ginseng 40-20 Main Street, Flushing, NY 11354	South America	Species	Holothuria	Holothuria tubulosa	Holothuria tubulosa	0.9809	Holothuria lentiginosa	0.9223
FL06_4	Flushing	Zen Ginseng 40-20 Main Street, Flushing, NY 11354	South America	Species	Holothuria	Holothuria tubulosa	Holothuria tubulosa	0.9812	Holothuria lentiginosa	0.9155
FL07_1	Flushing	Wing Fung 2019 Inc. 135-21 Roosevelt Ave, Flushing, NY 11354	not specified	Species	Actinopyga	Actinopyga agassizi	Actinopyga agassizi	0.9901	Actinopyga miliaris	0.8465
FL07_2	Flushing	Wing Fung 2019 Inc. 135-21 Roosevelt Ave, Flushing, NY 11354	not specified	Inconclusive	Actinopyga	Actinopyga agassizi	Actinopyga agassizi	0.9585	Actinopyga lecanora	0.845
FL08_1	Flushing	New York Food and Herbs 135-42 Roosevelt Ave, Flushing Ave. 11354	South America	Species	Actinopyga	Actinopyga agassizi	Actinopyga agassizi	0.989	Actinopyga mauritiana	0.8499
FL08_2	Flushing	New York Food and Herbs 135-42 Roosevelt Ave, Flushing Ave. 11354	South America	Species	Actinopyga	Actinopyga agassizi	Actinopyga agassizi	0.9854	Actinopyga lecanora	0.8717
FL08_3	Flushing	New York Food and Herbs 135-42 Roosevelt Ave, Flushing Ave. 11354	South America	Species	Actinopyga	Actinopyga agassizi	Actinopyga agassizi	0.981	Actinopyga miliaris	0.8447
FL08_4	Flushing	New York Food and Herbs 135-42 Roosevelt Ave, Flushing Ave. 11354	South America	Genus	Actinopyga	Actinopyga sp.	Actinopyga agassizi	0.9791	Actinopyga lecanora	0.8705
FL09_1	Flushing	New York Ginseng City 135-19 Roosevelt Avenue Flushing, NY 11354	Mexico	Genus	Actinopyga	Actinopyga agassizi	Actinopyga agassizi	0.9792	Actinopyga lecanora	0.8542
FL10_3	Flushing	7955 AE Company Inc. 135-08 Roosevelt Ave. Flushing, NY 11354	South America	Genus	Stichopus	Stichopus sp.	Stichopus horrens	0.9718	Stichopus monotuberculatus	0.9671
FL10_4	Flushing	7955 AE Company Inc. 135-08 Roosevelt Ave. Flushing, NY 11354	South America	Genus	Stichopus	Stichopus sp.	Stichopus horrens	0.9765	Stichopus monotuberculatus	0.9765
FL11_1	Flushing	Kar Wor Tong Inc. 135-50 Roosevelt Inc. Flushing, NY 11354	South America	Species	Isostichopus	Isostichopus fuscus	Isostichopus fuscus	0.9994	Isostichopus badionotus	0.9289
FL11_2	Flushing	Kar Wor Tong Inc. 135-50 Roosevelt Inc. Flushing, NY 11354	South America	Species	Isostichopus	Isostichopus fuscus	Isostichopus fuscus	0.981	Isostichopus badionotus	0.9289
MN12_2	Manhattan	Run Feng Trading Co. 123 Mott Street, New York, NY	South America	Inconclusive	N/A	N/A	Stichopus naso	95.02	Fridericia galba	0.7798
MN02_3	Manhattan	Chung Chou City 1. Inc. LLC 212-285-2288 212-274-9338 218 Grand Street NY,NY	South America	Inconclusive	N/A	Stichopus or Isostichopus sp.	Stichopus horrens	0.9718	Isostichopus badionotus	0.9718
MN03_3	Manhattan	Tai Lee Herbs 212-219-2888 11 Bowery NY, NY 10002	South America	Inconclusive	N/A	Stichopus or Isostichopus sp.	Stichopus horrens	0.9626	Isostichopus badionotus	0.9626
MN01_2	Manhattan	Ewa Trading Co Inc. 212-964-2017 80 Mulberry Street NY, NY 10013	South America	Inconclusive	N/A	Stichopus or Isostichopus sp.	Stichopus horrens	0.9718	Isostichopus badionotus	0.9718
MN02_1	Manhattan	Chung Chou City 1. Inc. LLC 212-285-2288 212-274-9338 218 Grand Street NY,NY	South America	Inconclusive	N/A	Stichopus or Isostichopus sp.	Stichopus horrens	0.9668	Isostichopus badionotus	0.9668
MN03_1	Manhattan	Tai Lee Herbs 212-219-2888 11 Bowery NY, NY 10002	South America	Inconclusive	N/A	Stichopus or Isostichopus sp.	Stichopus horrens	0.967	Isostichopus badionotus	0.967
MN04_2	Manhattan	Li's Herb Inc. 212 625-9595 93 Elizabeth Street, NY	South America	Inconclusive	N/A	Stichopus or Isostichopus sp.	Isostichopus badionotus	0.9984	Stichopus horrens	99.84
MN04_1	Manhattan	Li's Herb Inc. 212 625-9595 93 Elizabeth Street, NY	South America	Inconclusive	N/A	Stichopus or Isostichopus sp.	Stichopus horrens	0.972	Isostichopus badionotus	0.972
MN04_3	Manhattan	Li's Herb Inc. 212 625-9595 93 Elizabeth Street, NY	South America	Inconclusive	N/A	Stichopus or Isostichopus sp.	Stichopus horrens	0.9673	Isostichopus badionotus	0.9673
MN05_1	Manhattan	Po Wing Hong Market 49 Elizabeth Street NY, NY 10013	South America	Inconclusive	N/A	Stichopus or Isostichopus sp.	Isostichopus badionotus	0.9969	Stichopus horrens	0.9877
MN06_1	Manhattan	Wing Fat Company Inc 158 Hester Street, NY, NY 10013	South America	Genus	Stichopus	Stichopus sp.	Stichopus horrens	0.9765	Stichopus monotuberculatus	0.9718
MN06_2	Manhattan	Wing Fat Company Inc 158 Hester Street, NY, NY 10013	South America	Genus	Stichopus	Stichopus sp.	Stichopus horrens	0.9765	Stichopus monotuberculatus	0.9718
MN06_3	Manhattan	Wing Fat Company Inc 158 Hester Street, NY, NY 10013	South America	Genus	Stichopus	Stichopus sp.	Stichopus horrens	0.9765	Stichopus monotuberculatus	0.9765
MN07_2	Manhattan	Wing Fat Company Inc. 212-966-2226 1 Division Street, New York, NY 10002	South America	Genus	Stichopus	Stichopus sp.	Stichopus horrens	0.9952	Stichopus monotuberculatus	0.9905
MN08_1	Manhattan	Shing Fu Tong 212-219-2866 158 Hester Street #B NY,NY 10013	South America	Inconclusive	N/A	Stichopus or Isostichopus sp.	Stichopus horrens	0.9763	Isostichopus badionotus	0.9763
MN08_2	Manhattan	Shing Fu Tong 212-219-2866 158 Hester Street #B NY,NY 10013	South America	Inconclusive	N/A	Stichopus or Isostichopus sp.	Stichopus horrens	0.9673	Isostichopus badionotus	0.9673
MN08_3	Manhattan	Shing Fu Tong 212-219-2866 158 Hester Street #B NY,NY 10013	South America	Inconclusive	N/A	Stichopus or Isostichopus sp.	Stichopus horrens	0.9631	Isostichopus badionotus	0.9631
MN09_1	Manhattan	Calihouse Nutrition 167 Hester St. NY,NY 10013	South America	Inconclusive	N/A	Stichopus or Isostichopus sp.	Stichopus horrens	0.9765	Isostichopus badionotus	0.9765
MN10_1	Manhattan	Happy Li Trading 212-226-0850 917-551-0965 94 Elizabeth Street NY, NY 10013	South America	Inconclusive	N/A	Stichopus or Isostichopus sp.	Stichopus horrens	0.9765	Isostichopus badionotus	0.9765
MN10_2	Manhattan	Happy Li Trading 212-226-0850 917-551-0965 94 Elizabeth Street NY, NY 10013	South America	Genus	Stichopus	Stichopus sp.	Stichopus horrens	0.9811	Stichopus monotuberculatus	0.9764
MN10_3	Manhattan	Happy Li Trading 212-226-0850 917-551-0965 94 Elizabeth Street NY, NY 10013	South America	Genus	Stichopus	Stichopus sp.	Stichopus horrens	0.9724	Stichopus monotuberculatus	0.9677
MN11_1	Manhattan	Ocean's Treasure and Herb Trading Corp 145C Hester St. NY, NY 10002	South America	Genus	Holothuria	Holothuria sp.	Holothuria mexicana	0.9947	Holothuria floridana	0.9895
MN11_4	Manhattan	Ocean's Treasure and Herb Trading Corp 145C Hester St. NY, NY 10002	South America	Genus	Holothuria	Holothuria sp.	Holothuria mexicana	0.9948	Holothuria floridana	0.9895
MN12_1	Manhattan	Run Feng Trading Co. 123 Mott Street, New York, NY	South America	Inconclusive	N/A	N/A	Stichopus naso	0.9031	Stichopus horrens	0.8811
BK02_2	Brooklyn	Tian Xuan Trading Co. 6323 8th Avenue Suite A Brooklyn NY 11220	South America	Inconclusive	N/A	N/A	Holothuria mexicana	0.9574	Holothuria floridana	0.9558
BK12_1	Brooklyn	Wing Fung 2019 5507 8th Avenue Brooklyn, NY 11220	South America	Genus	Stichopus	Stichopus sp.	Stichopus monotuberculatus	0.9968	Stichopus horrens	0.9968
BK04_1	Brooklyn	7955 AE Company Inc. 5905 8th Avenue Brooklyn, NY 112200	South America	Inconclusive	N/A	N/A	Stichopus horrens	0.9435	Stichopus monotuberculatus	0.9409
